# Supplementary material for: Who will win where and why? An ecophysiological dissection of the competition between a tropical pasture grass and the invasive weed Bracken over an elevation range of 1000 m in the tropical Andes
Source: PubMed Central journal article supplement (PMC6089443; doi:10.1371/journal.pone.0202255), 2018-08-13
Supplement: pone.0202255.s001.pdf [file pone.0202255.s001.pdf]

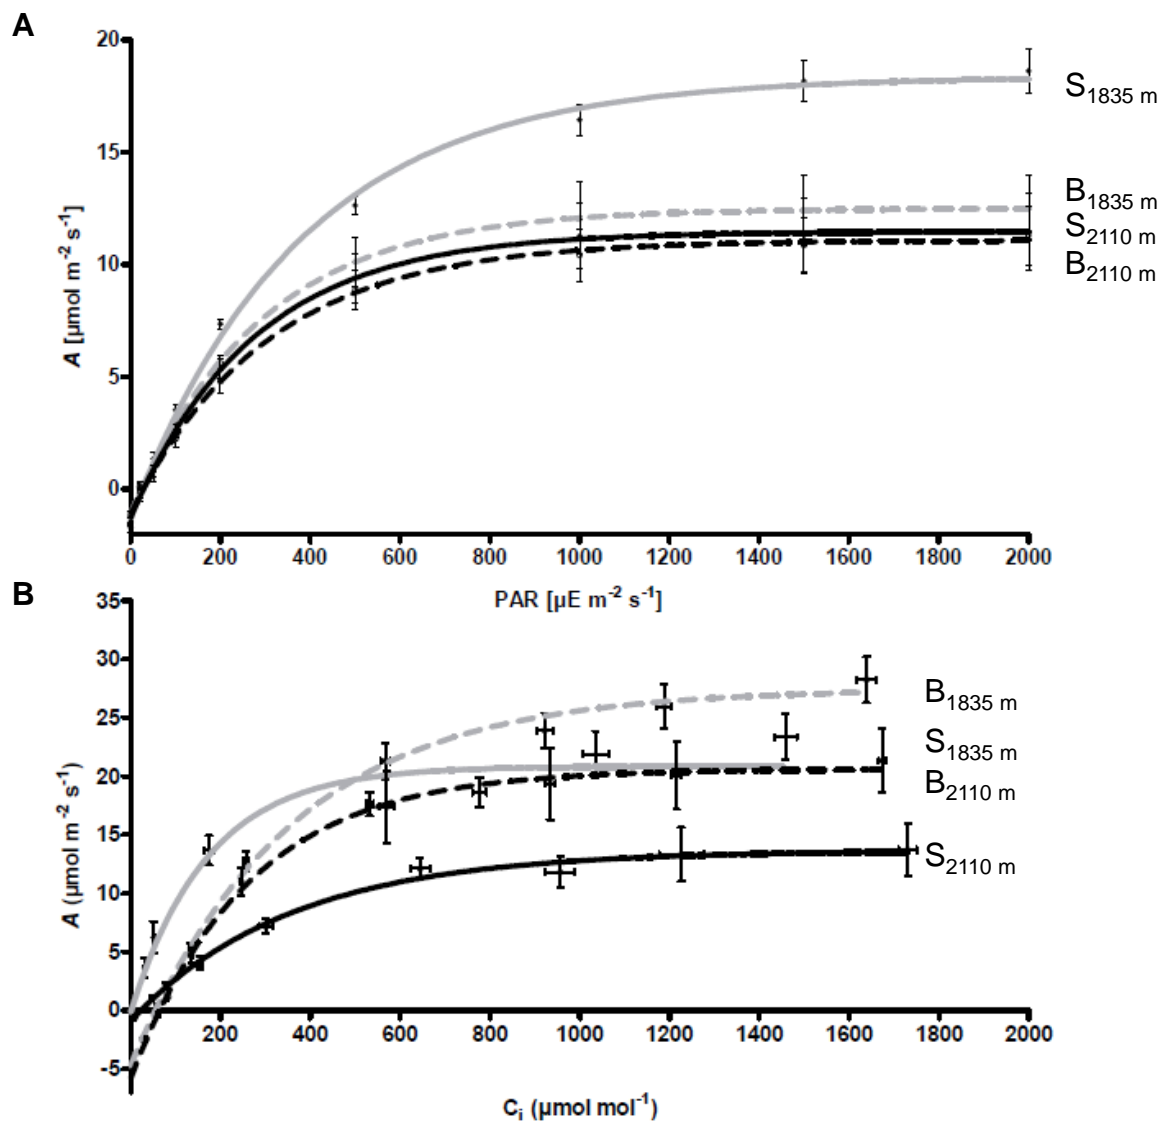

**S1 Figure. Photosynthetic characterization of Bracken and Setaria in the field. (A)** Light-response curves of photosynthetic  $\text{CO}_2$  net uptake ( $A$ ) of Setaria (solid lines) and Bracken (dashed lines).  $A$  was determined as dependent on the light intensity (PAR). The light-saturation curves were taken at two different elevations: 1835 m (gray lines) and 2110 m (black lines). The measurements were performed at  $400 \mu\text{mol CO}_2 \text{ mol}^{-1}$  and  $25^\circ\text{C}$ . **(B)** Photosynthesis rates were determined as dependent on  $\text{CO}_2$  partial pressure ( $C_i$ ).  $A/C_i$  curves were taken at two different elevations: 1835 m (gray lines) and 2110 m (black lines). The measurements were performed with  $1200 \mu\text{mol quanta m}^{-2} \text{s}^{-1}$  and at  $25^\circ\text{C}$  ( $n \geq 3$ ). (modified from Knuesting et al., 2015)

Knuesting J, Schorsch M, Voss I, Brenner S, Bendix J, Strobl S, Beck E, Scheibe R (2015) Modeling the competition between the pasture grass *Setaria sphacelata* and Bracken: Comparison of photosynthetic capacities at different altitudes. *Tabebuia Bulletin* 1(4): 16-19.
