# Supplementary material for: Who will win where and why? An ecophysiological dissection of the competition between a tropical pasture grass and the invasive weed Bracken over an elevation range of 1000 m in the tropical Andes
Source: PubMed Central journal article supplement (PMC6089443; doi:10.1371/journal.pone.0202255), 2018-08-13
Supplement: pone.0202255.s002.pdf [file pone.0202255.s002.pdf]

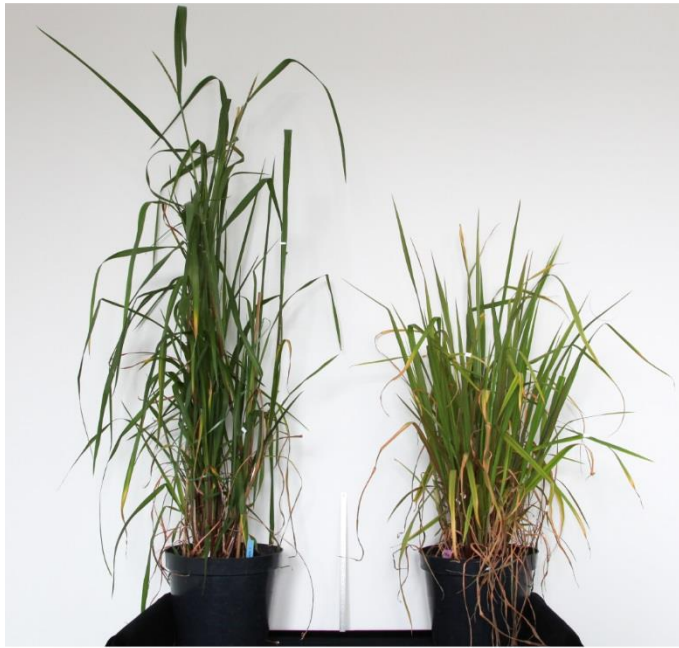

Control

UV

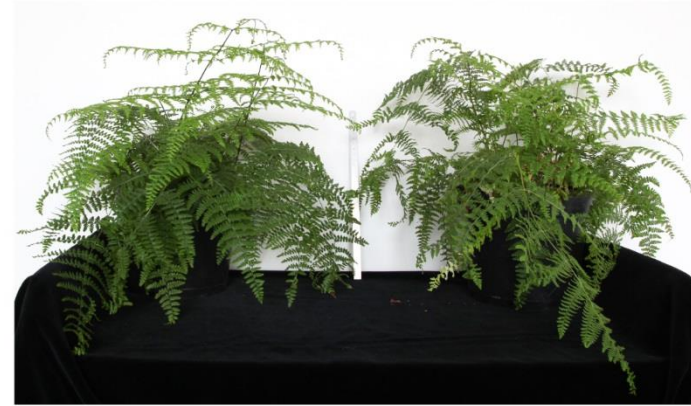

Control

UV

**S2 Figure. Influence of supplemental UV in the greenhouse on growth and photosynthesis of Setaria and Bracken.** Setaria (left) and Bracken (right) were exposed to UV light, with twelve 30-min periods of UV per day for 70 days (UV), and without additional UV-light exposure (Control). The plants were grown at 20°C.
