# Supplementary material for: Who will win where and why? An ecophysiological dissection of the competition between a tropical pasture grass and the invasive weed Bracken over an elevation range of 1000 m in the tropical Andes
Source: PubMed Central journal article supplement (PMC6089443; doi:10.1371/journal.pone.0202255), 2018-08-13
Supplement: pone.0202255.s004.pdf [file pone.0202255.s004.pdf]

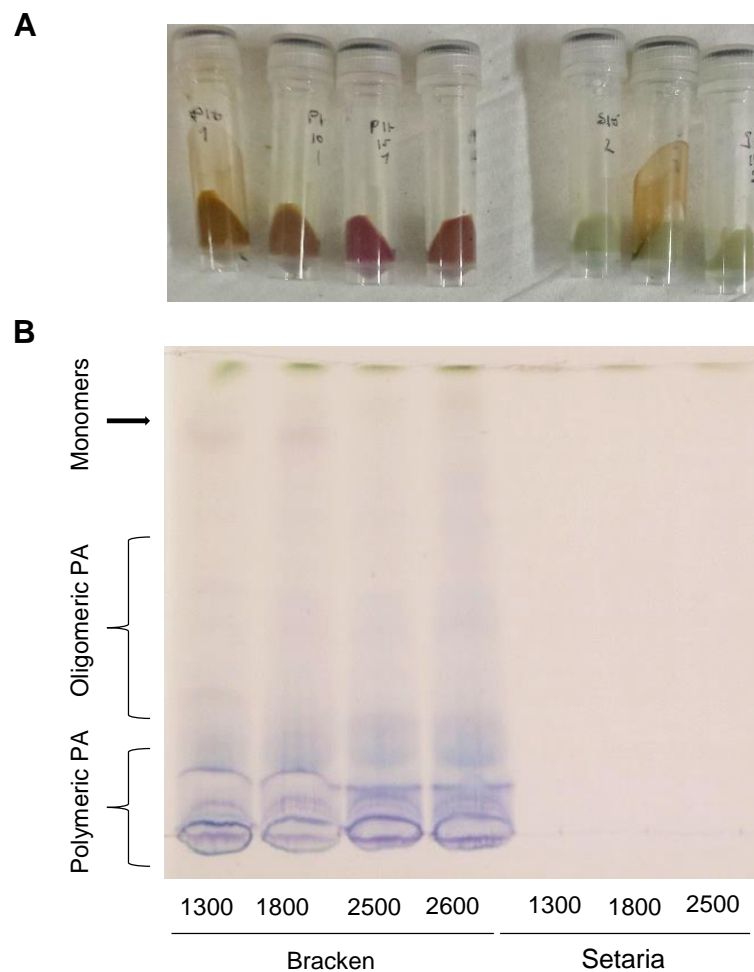

**S4 Figure. Proanthocyanidin contents in field-grown plants. (A)** Colored pellets after extraction of soluble flavonoids. Origin of the samples is indicated with the corresponding elevations in m a.s.l.. **(B)** Separation of an aqueous HCl-MeOH extract by TLC (10  $\mu$ l of the extract was loaded on a silica plate) and spraying the plate with 0.1% DMACA. Numbers are indicating the elevation of field-grown plants in m a.s.l..
