# Supplementary material for: Who will win where and why? An ecophysiological dissection of the competition between a tropical pasture grass and the invasive weed Bracken over an elevation range of 1000 m in the tropical Andes
Source: PubMed Central journal article supplement (PMC6089443; doi:10.1371/journal.pone.0202255), 2018-08-13
Supplement: pone.0202255.s005.pdf [file pone.0202255.s005.pdf]

**S1 Table. Geographical coordinates of the field sites.**

| <b>Site</b> | <b>Elevation (m a.s.l.)</b> | <b>Lon° (E)</b> | <b>Lat° (N)</b> |
|-------------|-----------------------------|-----------------|-----------------|
| ECSF        | 1835                        | -79.078730      | -3.971359       |
| Pasture     | 2110                        | -79.076820      | -3.964252       |
| El Tiro     | 2825                        | -79.144074      | -3.986897       |
| Site 1      | 1300                        | -79.007445      | -4.028084       |
| Site 2      | 1800                        | -79.078730      | -3.972451       |
| Site 3      | 2500                        | -79.127134      | -3.983905       |
| Site 4*     | 2600                        | -79.137015      | -3.982028       |

\*only Bracken
