# Supplementary material for: Who will win where and why? An ecophysiological dissection of the competition between a tropical pasture grass and the invasive weed Bracken over an elevation range of 1000 m in the tropical Andes
Source: PubMed Central journal article supplement (PMC6089443; doi:10.1371/journal.pone.0202255), 2018-08-13
Supplement: pone.0202255.s006.pdf [file pone.0202255.s006.pdf]

**S2 Table. MS-identified flavonoids of Setaria grown under greenhouse and field conditions.**

| Type of aglucon    | Samples from greenhouse       |                               | Samples from field            |                             |                                             |
|--------------------|-------------------------------|-------------------------------|-------------------------------|-----------------------------|---------------------------------------------|
|                    | Control                       | UV                            | 1300 m                        | 1800 m                      | 2500 m                                      |
| Flavanon           | Poncirin (N;E)                | Poncirin (N;E)                | Poncirin (E; N)               | Poncirin (E; N)             | Poncirin (E; N)                             |
|                    | ---                           | Hesperidin (E)                | ---                           | Hesperidin (E; N)           | Hesperidin (E; N)                           |
| Flavonol           | Kaempferol-3-O-rutinoside (N) | Kaempferol-3-O-rutinoside (N) | Kaempferol-3-O-rutinoside (E) | K-3-O-rutinoside (E;N)      | K-rut.(E;N)/K-7-O-neohesperid. (E)          |
| Flavon             | Luteolin (N)/Orientin (E)     | Luteolin (N)/Orientin (E)     | Luteolin (E)/Orientin (N)     | Luteolin (N)/Orientin (E;N) | Luteolin (N)/Orientin (E)                   |
|                    | Tricin (N; E)                 | Tricin (N;E)                  | Tricin (E)                    | Tricin (E)                  | Tricin (E)                                  |
|                    | Vitexin-2"-rhamnoside (N,E)   | Vitexin-2"-rhamnoside (N;E)   | Vitexin-2"-rhamnoside (E; N)  | Vitexin-2"-rhamnoside (E)   | Vitexin-2"-rhamnoside (E; N)/Vitexin (E; N) |
|                    | Saponarin (E)                 | Saponarin (E)                 | Saponarin (E)                 | ---                         | Saponarin (E)                               |
|                    | Scoparin (E)                  | Scoparin (E)                  | ---                           | ---                         | ---                                         |
| Anthocyanidin conj | ---                           | ---                           | Cyanidin* (N)                 | Cyanidin* (N)               | Cyanidin* (N)                               |

Flavonoids were extracted with aqueous HCl-MeOH and defatted with petrolether (E) or harvested with nanoparticles (N).

\* Cyanidin 3-O-[2"-O-(2'''-O-(sinapoyl) xylosyl) 6"-O-(p-O-(glucosyl) p-coumaroyl) glucoside] 5-O-glucoside, K = Kaempferol
