# Supplementary material for: Who will win where and why? An ecophysiological dissection of the competition between a tropical pasture grass and the invasive weed Bracken over an elevation range of 1000 m in the tropical Andes
Source: PubMed Central journal article supplement (PMC6089443; doi:10.1371/journal.pone.0202255), 2018-08-13
Supplement: pone.0202255.s007.pdf [file pone.0202255.s007.pdf]

**S3 Table. MS-identified flavonoids of Bracken grown in greenhouse and under field conditions.**

| Type of aglucon    | Samples from greenhouse |                         | Samples from field         |                            |                            |                          |
|--------------------|-------------------------|-------------------------|----------------------------|----------------------------|----------------------------|--------------------------|
|                    | Control                 | UV                      | 1300 m                     | 1800 m                     | 2500 m                     | 2600 m                   |
| Flavanon           | ---                     | ---                     | Hesperidin (E)             | Hesperidin (E)             | ---                        | ---                      |
|                    | ---                     | ---                     | ---                        | ---                        | Poncirin (E, N)            | Poncirin (E)             |
| Flavonol           | K-3-O-rutinoside (N;E)  | K-3-O-rutinoside (N;E)  | K-7-O-neohesperidoside (N) | K-7-O-neohesperidoside (N) | K-7-O-neohesperidoside (N) | K-7-O-neohesp (N)        |
|                    | ---                     | ---                     | ---                        | ---                        | K-3-O-rutinoside (E, N)    | K-3-O-rutinoside (E,N)   |
|                    | ---                     | Quercetin(E)/ Rutin (E) | Quercetin (E)/Rutin (E,N)  | Quercetin (E;N)/Rutin(E,N) | Quercetin (N)/Rutin(E,N)   | Quercetin (N)/Rutin(E,N) |
| Flavon             | Orientin (E)            | Orientin (E)            | Orientin (N)               | Orientin (N)               | Orientin (N)               | ---                      |
| Anthocyanidin conj | ---                     | ---                     | ---                        | ---                        | Cyanidin* (E)              | Cyanidin* (E, N)         |
| Condensed tannin   | ---                     | ---                     | ---                        | ---                        | Procyanidin B1 (E)         | ---                      |

Flavonoids were extracted with aqueous HCl-MeOH and defatted with petrolether (E) or harvested with nanoparticles (N).

\* Cyanidin 3-O-[2"-O-(2'''-O-(sinapoyl) xylosyl) 6"-O-(p-O-(glucosyl) p-coumaroyl) glucoside] 5-O-glucoside, K = Kaempferol
